# Supplementary material for: The Strong Position of Silver Fir (Abies alba Mill.) in Fertile Variants of Beech and Oak-Hornbeam Forests in the Light of Studies Conducted in the Sudetes
Source: MDPI journal article supplement (doi:10.3390/f12091203), 2021-09-04
Supplement: s1 [file s1]

**Table S1.** ‘The strong position of silver fir (*Abies alba* Mill.) in fertile variants of beech and oak-hornbeam forests in the light of studies conducted in the Sudetes’, supplementary materials: *Abies alba* localities (FL).

| Forest district | Forest range (FR) | F.R no. | Subdistrict   | Forest plot (FP) no. |
|-----------------|-------------------|---------|---------------|----------------------|
| Bardo Śląskie   | Wilcza            | 03      | Bardo Śląskie | 211g                 |
| Bardo Śląskie   | Opolnica          | 05      | Bardo Śląskie | 217b                 |
| Bardo Śląskie   | Opolnica          | 05      | Bardo Śląskie | 220d                 |
| Bardo Śląskie   | Opolnica          | 05      | Bardo Śląskie | 224a                 |
| Bardo Śląskie   | Opolnica          | 05      | Bardo Śląskie | 224c                 |
| Bardo Śląskie   | Opolnica          | 05      | Bardo Śląskie | 243i                 |
| Bardo Śląskie   | Opolnica          | 05      | Bardo Śląskie | 251f                 |
| Bardo Śląskie   | Opolnica          | 05      | Bardo Śląskie | 253l                 |
| Bardo Śląskie   | Opolnica          | 05      | Bardo Śląskie | 255l                 |
| Bardo Śląskie   | Opolnica          | 05      | Bardo Śląskie | 256a                 |
| Bardo Śląskie   | Opolnica          | 05      | Bardo Śląskie | 259b                 |
| Bardo Śląskie   | Opolnica          | 05      | Bardo Śląskie | 259c                 |
| Bardo Śląskie   | Jemna             | 02      | Bardo Śląskie | 118g                 |
| Bardo Śląskie   | Jemna             | 02      | Bardo Śląskie | 118i                 |
| Bardo Śląskie   | Tarnawa           | 04      | Bardo Śląskie | 150c                 |
| Bardo Śląskie   | Tarnawa           | 04      | Bardo Śląskie | 151b                 |
| Bardo Śląskie   | Tarnawa           | 04      | Bardo Śląskie | 174a                 |
| Bardo Śląskie   | Tarnawa           | 04      | Bardo Śląskie | 174c                 |
| Bardo Śląskie   | Wojciechowice     | 06      | Kamieniec     | 265j                 |
| Bardo Śląskie   | Wojciechowice     | 06      | Kamieniec     | 266a                 |
| Bardo Śląskie   | Wojciechowice     | 06      | Kamieniec     | 266h                 |
| Bardo Śląskie   | Wojciechowice     | 06      | Kamieniec     | 266m                 |
| Bardo Śląskie   | Wojciechowice     | 06      | Kamieniec     | 268k                 |
| Bardo Śląskie   | Laskówka          | 07      | Kamieniec     | 106d                 |
| Bardo Śląskie   | Laskówka          | 07      | Kamieniec     | 106g                 |
| Bardo Śląskie   | Laskówka          | 07      | Kamieniec     | 141c                 |
| Bardo Śląskie   | Laskówka          | 07      | Kamieniec     | 156g                 |
| Bardo Śląskie   | Mąkolno           | 08      | Kamieniec     | 96d                  |
| Bardo Śląskie   | Złoty Stok        | 10      | Kamieniec     | 187f                 |
| Bardo Śląskie   | Złoty Stok        | 10      | Kamieniec     | 187j                 |
| Bardo Śląskie   | Złoty Stok        | 10      | Kamieniec     | 188c                 |
| Bardo Śląskie   | Złoty Stok        | 10      | Kamieniec     | 198d                 |
| Bardo Śląskie   | Złoty Stok        | 10      | Kamieniec     | 200i                 |
| Bardo Śląskie   | Złoty Stok        | 10      | Kamieniec     | 203a                 |
| Bardo Śląskie   | Złoty Stok        | 10      | Kamieniec     | 188f                 |
| Bardo Śląskie   | Tarnawa           | 04      | Bardo Śląskie | 176s                 |
| Bardo Śląskie   | Opolnica          | 05      | Bardo Śląskie | 259a                 |
| Bardo Śląskie   | Wilcza            | 03      | Bardo Śląskie | 126Ai                |
| Bardo Śląskie   | Wilcza            | 03      | Bardo Śląskie | 133c                 |
| Bardo Śląskie   | Wilcza            | 03      | Bardo Śląskie | 140j                 |
| Bardo Śląskie   | Tarnawa           | 04      | Bardo Śląskie | 149j                 |
| Bardo Śląskie   | Tarnawa           | 04      | Bardo Śląskie | 150d                 |
| Bardo Śląskie   | Tarnawa           | 04      | Bardo Śląskie | 151k                 |
| Bardo Śląskie   | Tarnawa           | 04      | Bardo Śląskie | 156c                 |
| Bardo Śląskie   | Tarnawa           | 04      | Bardo Śląskie | 162g                 |
| Bardo Śląskie   | Tarnawa           | 04      | Bardo Śląskie | 173d                 |
| Bardo Śląskie   | Tarnawa           | 04      | Bardo Śląskie | 173f                 |

|               |               |    |               |      |
|---------------|---------------|----|---------------|------|
| Bardo Śląskie | Tarnawa       | 04 | Bardo Śląskie | 173h |
| Bardo Śląskie | Tarnawa       | 04 | Bardo Śląskie | 174h |
| Bardo Śląskie | Tarnawa       | 04 | Bardo Śląskie | 174i |
| Bardo Śląskie | Tarnawa       | 04 | Bardo Śląskie | 175j |
| Bardo Śląskie | Tarnawa       | 04 | Bardo Śląskie | 176c |
| Bardo Śląskie | Tarnawa       | 04 | Bardo Śląskie | 176d |
| Bardo Śląskie | Tarnawa       | 04 | Bardo Śląskie | 176n |
| Bardo Śląskie | Tarnawa       | 04 | Bardo Śląskie | 179l |
| Bardo Śląskie | Wilcza        | 03 | Bardo Śląskie | 180c |
| Bardo Śląskie | Wilcza        | 03 | Bardo Śląskie | 182a |
| Bardo Śląskie | Opolnica      | 05 | Bardo Śląskie | 191f |
| Bardo Śląskie | Opolnica      | 05 | Bardo Śląskie | 192k |
| Bardo Śląskie | Wilcza        | 03 | Bardo Śląskie | 195c |
| Bardo Śląskie | Wilcza        | 03 | Bardo Śląskie | 198i |
| Bardo Śląskie | Wilcza        | 03 | Bardo Śląskie | 198l |
| Bardo Śląskie | Wilcza        | 03 | Bardo Śląskie | 198o |
| Bardo Śląskie | Wilcza        | 03 | Bardo Śląskie | 199c |
| Bardo Śląskie | Wilcza        | 03 | Bardo Śląskie | 200b |
| Bardo Śląskie | Opolnica      | 05 | Bardo Śląskie | 203c |
| Bardo Śląskie | Opolnica      | 05 | Bardo Śląskie | 203f |
| Bardo Śląskie | Opolnica      | 05 | Bardo Śląskie | 204g |
| Bardo Śląskie | Opolnica      | 05 | Bardo Śląskie | 205f |
| Bardo Śląskie | Opolnica      | 05 | Bardo Śląskie | 207c |
| Bardo Śląskie | Wilcza        | 03 | Bardo Śląskie | 211c |
| Bardo Śląskie | Opolnica      | 05 | Bardo Śląskie | 217d |
| Bardo Śląskie | Opolnica      | 05 | Bardo Śląskie | 218i |
| Bardo Śląskie | Opolnica      | 05 | Bardo Śląskie | 221a |
| Bardo Śląskie | Opolnica      | 05 | Bardo Śląskie | 236b |
| Bardo Śląskie | Opolnica      | 05 | Bardo Śląskie | 236c |
| Bardo Śląskie | Opolnica      | 05 | Bardo Śląskie | 237k |
| Bardo Śląskie | Opolnica      | 05 | Bardo Śląskie | 241a |
| Bardo Śląskie | Opolnica      | 05 | Bardo Śląskie | 242h |
| Bardo Śląskie | Opolnica      | 05 | Bardo Śląskie | 243a |
| Bardo Śląskie | Opolnica      | 05 | Bardo Śląskie | 243k |
| Bardo Śląskie | Opolnica      | 05 | Bardo Śląskie | 243l |
| Bardo Śląskie | Opolnica      | 05 | Bardo Śląskie | 244f |
| Bardo Śląskie | Opolnica      | 05 | Bardo Śląskie | 247j |
| Bardo Śląskie | Opolnica      | 05 | Bardo Śląskie | 250c |
| Bardo Śląskie | Opolnica      | 05 | Bardo Śląskie | 254b |
| Bardo Śląskie | Opolnica      | 05 | Bardo Śląskie | 254d |
| Bardo Śląskie | Opolnica      | 05 | Bardo Śląskie | 254j |
| Bardo Śląskie | Opolnica      | 05 | Bardo Śląskie | 256c |
| Bardo Śląskie | Opolnica      | 05 | Bardo Śląskie | 256f |
| Bardo Śląskie | Opolnica      | 05 | Bardo Śląskie | 257a |
| Bardo Śląskie | Opolnica      | 05 | Bardo Śląskie | 257b |
| Bardo Śląskie | Opolnica      | 05 | Bardo Śląskie | 257c |
| Bardo Śląskie | Opolnica      | 05 | Bardo Śląskie | 257f |
| Bardo Śląskie | Wojciechowice | 06 | Kamieniec     | 269d |
| Bardo Śląskie | Wojciechowice | 06 | Kamieniec     | 270j |
| Bardo Śląskie | Wojciechowice | 06 | Kamieniec     | 297h |
| Bardo Śląskie | Złoty Stok    | 10 | Kamieniec     | 191f |

|               |               |    |               |       |
|---------------|---------------|----|---------------|-------|
| Bardo Śląskie | Złoty Stok    | 10 | Kamieniec     | 203j  |
| Bardo Śląskie | Złoty Stok    | 10 | Kamieniec     | 203k  |
| Bardo Śląskie | Chwalisław    | 11 | Kamieniec     | 216Af |
| Bardo Śląskie | Tarnawa       | 04 | Bardo Śląskie | 177c  |
| Bardo Śląskie | Tarnawa       | 04 | Bardo Śląskie | 154b  |
| Bardo Śląskie | Opolnica      | 05 | Bardo Śląskie | 259f  |
| Bardo Śląskie | Jemna         | 02 | Bardo Śląskie | 113d  |
| Bardo Śląskie | Jemna         | 02 | Bardo Śląskie | 115b  |
| Bardo Śląskie | Jemna         | 02 | Bardo Śląskie | 116i  |
| Bardo Śląskie | Jemna         | 02 | Bardo Śląskie | 117h  |
| Bardo Śląskie | Wilcza        | 03 | Bardo Śląskie | 126n  |
| Bardo Śląskie | Wilcza        | 03 | Bardo Śląskie | 142c  |
| Bardo Śląskie | Tarnawa       | 04 | Bardo Śląskie | 143a  |
| Bardo Śląskie | Wilcza        | 03 | Bardo Śląskie | 146r  |
| Bardo Śląskie | Tarnawa       | 04 | Bardo Śląskie | 148m  |
| Bardo Śląskie | Tarnawa       | 04 | Bardo Śląskie | 149a  |
| Bardo Śląskie | Tarnawa       | 04 | Bardo Śląskie | 149b  |
| Bardo Śląskie | Tarnawa       | 04 | Bardo Śląskie | 161k  |
| Bardo Śląskie | Tarnawa       | 04 | Bardo Śląskie | 177h  |
| Bardo Śląskie | Tarnawa       | 04 | Bardo Śląskie | 193c  |
| Bardo Śląskie | Opolnica      | 05 | Bardo Śląskie | 213a  |
| Bardo Śląskie | Opolnica      | 05 | Bardo Śląskie | 243b  |
| Bardo Śląskie | Opolnica      | 05 | Bardo Śląskie | 244g  |
| Bardo Śląskie | Opolnica      | 05 | Bardo Śląskie | 251c  |
| Bardo Śląskie | Opolnica      | 05 | Bardo Śląskie | 252a  |
| Bardo Śląskie | Opolnica      | 05 | Bardo Śląskie | 252l  |
| Bardo Śląskie | Opolnica      | 05 | Bardo Śląskie | 253j  |
| Bardo Śląskie | Opolnica      | 05 | Bardo Śląskie | 255d  |
| Bardo Śląskie | Opolnica      | 05 | Bardo Śląskie | 258a  |
| Bardo Śląskie | Wojciechowice | 06 | Kamieniec     | 263h  |
| Bardo Śląskie | Wojciechowice | 06 | Kamieniec     | 276a  |
| Bardo Śląskie | Wojciechowice | 06 | Kamieniec     | 276b  |
| Bardo Śląskie | Wojciechowice | 06 | Kamieniec     | 276i  |
| Bardo Śląskie | Wojciechowice | 06 | Kamieniec     | 277c  |
| Bardo Śląskie | Wojciechowice | 06 | Kamieniec     | 279b  |
| Bardo Śląskie | Wojciechowice | 06 | Kamieniec     | 280d  |
| Bardo Śląskie | Wojciechowice | 06 | Kamieniec     | 283d  |
| Bardo Śląskie | Wojciechowice | 06 | Kamieniec     | 283i  |
| Bardo Śląskie | Wojciechowice | 06 | Kamieniec     | 284f  |
| Bardo Śląskie | Wojciechowice | 06 | Kamieniec     | 286i  |
| Bardo Śląskie | Wojciechowice | 06 | Kamieniec     | 287h  |
| Bardo Śląskie | Wojciechowice | 06 | Kamieniec     | 287j  |
| Bardo Śląskie | Wojciechowice | 06 | Kamieniec     | 288c  |
| Bardo Śląskie | Wojciechowice | 06 | Kamieniec     | 289a  |
| Bardo Śląskie | Wojciechowice | 06 | Kamieniec     | 289g  |
| Bardo Śląskie | Wojciechowice | 06 | Kamieniec     | 290d  |
| Bardo Śląskie | Wojciechowice | 06 | Kamieniec     | 294c  |
| Bardo Śląskie | Wojciechowice | 06 | Kamieniec     | 296b  |
| Bardo Śląskie | Wojciechowice | 06 | Kamieniec     | 296c  |
| Bardo Śląskie | Wojciechowice | 06 | Kamieniec     | 323b  |
| Bardo Śląskie | Wojciechowice | 06 | Kamieniec     | 325c  |

|               |            |    |               |      |
|---------------|------------|----|---------------|------|
| Bardo Śląskie | Laskówka   | 07 | Kamieniec     | 140h |
| Bardo Śląskie | Laskówka   | 07 | Kamieniec     | 142c |
| Bardo Śląskie | Laskówka   | 07 | Kamieniec     | 143f |
| Bardo Śląskie | Laskówka   | 07 | Kamieniec     | 150i |
| Bardo Śląskie | Laski      | 12 | Kamieniec     | 153i |
| Bardo Śląskie | Laskówka   | 07 | Kamieniec     | 156h |
| Bardo Śląskie | Złoty Stok | 10 | Kamieniec     | 187c |
| Bardo Śląskie | Złoty Stok | 10 | Kamieniec     | 212n |
| Bardo Śląskie | Złoty Stok | 10 | Kamieniec     | 212o |
| Bardo Śląskie | Chwalisław | 11 | Kamieniec     | 334b |
| Bardo Śląskie | Chwalisław | 11 | Kamieniec     | 337b |
| Bardo Śląskie | Laski      | 12 | Kamieniec     | 168c |
| Bardo Śląskie | Laski      | 12 | Kamieniec     | 180c |
| Bardo Śląskie | Laski      | 12 | Kamieniec     | 181a |
| Bardo Śląskie | Laski      | 12 | Kamieniec     | 181b |
| Bardo Śląskie | Laski      | 12 | Kamieniec     | 301b |
| Bardo Śląskie | Laski      | 12 | Kamieniec     | 303a |
| Bardo Śląskie | Laski      | 12 | Kamieniec     | 303g |
| Bardo Śląskie | Laski      | 12 | Kamieniec     | 306d |
| Bardo Śląskie | Laski      | 12 | Kamieniec     | 312f |
| Bardo Śląskie | Laski      | 12 | Kamieniec     | 315c |
| Bardo Śląskie | Laski      | 12 | Kamieniec     | 316a |
| Bardo Śląskie | Laski      | 12 | Kamieniec     | 326a |
| Bardo Śląskie | Laski      | 12 | Kamieniec     | 326h |
| Bardo Śląskie | Wilcza     | 03 | Bardo Śląskie | 139i |
| Bardo Śląskie | Tarnawa    | 04 | Bardo Śląskie | 173a |
| Bardo Śląskie | Złoty Stok | 10 | Kamieniec     | 210d |
| Bardo Śląskie | Tarnawa    | 04 | Bardo Śląskie | 154h |
| Bardo Śląskie | Tarnawa    | 04 | Bardo Śląskie | 176r |
| Bardo Śląskie | Jemna      | 02 | Bardo Śląskie | 116g |
| Bardo Śląskie | Jemna      | 02 | Bardo Śląskie | 117b |
| Bardo Śląskie | Jemna      | 02 | Bardo Śląskie | 118s |
| Bardo Śląskie | Wilcza     | 03 | Bardo Śląskie | 131d |
| Bardo Śląskie | Wilcza     | 03 | Bardo Śląskie | 134b |
| Bardo Śląskie | Wilcza     | 03 | Bardo Śląskie | 140l |
| Bardo Śląskie | Wilcza     | 03 | Bardo Śląskie | 146p |
| Bardo Śląskie | Tarnawa    | 04 | Bardo Śląskie | 148d |
| Bardo Śląskie | Tarnawa    | 04 | Bardo Śląskie | 148f |
| Bardo Śląskie | Tarnawa    | 04 | Bardo Śląskie | 148i |
| Bardo Śląskie | Tarnawa    | 04 | Bardo Śląskie | 149f |
| Bardo Śląskie | Tarnawa    | 04 | Bardo Śląskie | 150f |
| Bardo Śląskie | Tarnawa    | 04 | Bardo Śląskie | 150k |
| Bardo Śląskie | Tarnawa    | 04 | Bardo Śląskie | 151c |
| Bardo Śląskie | Tarnawa    | 04 | Bardo Śląskie | 151j |
| Bardo Śląskie | Tarnawa    | 04 | Bardo Śląskie | 151l |
| Bardo Śląskie | Opolnica   | 05 | Bardo Śląskie | 170c |
| Bardo Śląskie | Tarnawa    | 04 | Bardo Śląskie | 174b |
| Bardo Śląskie | Tarnawa    | 04 | Bardo Śląskie | 175b |
| Bardo Śląskie | Tarnawa    | 04 | Bardo Śląskie | 175k |
| Bardo Śląskie | Tarnawa    | 04 | Bardo Śląskie | 176a |
| Bardo Śląskie | Tarnawa    | 04 | Bardo Śląskie | 179a |

|               |               |    |               |      |
|---------------|---------------|----|---------------|------|
| Bardo Śląskie | Tarnawa       | 04 | Bardo Śląskie | 179f |
| Bardo Śląskie | Opolnica      | 05 | Bardo Śląskie | 190i |
| Bardo Śląskie | Opolnica      | 05 | Bardo Śląskie | 192c |
| Bardo Śląskie | Tarnawa       | 04 | Bardo Śląskie | 193f |
| Bardo Śląskie | Tarnawa       | 04 | Bardo Śląskie | 194b |
| Bardo Śląskie | Tarnawa       | 04 | Bardo Śląskie | 194d |
| Bardo Śląskie | Tarnawa       | 04 | Bardo Śląskie | 194h |
| Bardo Śląskie | Wilcza        | 03 | Bardo Śląskie | 197c |
| Bardo Śląskie | Wojciechowice | 06 | Kamieniec     | 263a |
| Bardo Śląskie | Wojciechowice | 06 | Kamieniec     | 263m |
| Bardo Śląskie | Wojciechowice | 06 | Kamieniec     | 264g |
| Bardo Śląskie | Wojciechowice | 06 | Kamieniec     | 264h |
| Bardo Śląskie | Wojciechowice | 06 | Kamieniec     | 265g |
| Bardo Śląskie | Wojciechowice | 06 | Kamieniec     | 285h |
| Bardo Śląskie | Laskówka      | 07 | Kamieniec     | 139b |
| Bardo Śląskie | Laskówka      | 07 | Kamieniec     | 140d |
| Bardo Śląskie | Laskówka      | 07 | Kamieniec     | 140g |
| Bardo Śląskie | Laskówka      | 07 | Kamieniec     | 141j |
| Bardo Śląskie | Laskówka      | 07 | Kamieniec     | 142a |
| Bardo Śląskie | Laskówka      | 07 | Kamieniec     | 143c |
| Bardo Śląskie | Laskówka      | 07 | Kamieniec     | 143d |
| Bardo Śląskie | Laskówka      | 07 | Kamieniec     | 145c |
| Bardo Śląskie | Laskówka      | 07 | Kamieniec     | 156f |
| Bardo Śląskie | Laskówka      | 07 | Kamieniec     | 157l |
| Bardo Śląskie | Laskówka      | 07 | Kamieniec     | 160f |
| Bardo Śląskie | Mąkolno       | 08 | Kamieniec     | 88g  |
| Bardo Śląskie | Mąkolno       | 08 | Kamieniec     | 93d  |
| Bardo Śląskie | Złoty Stok    | 10 | Kamieniec     | 198g |
| Bardo Śląskie | Złoty Stok    | 10 | Kamieniec     | 200a |
| Bardo Śląskie | Złoty Stok    | 10 | Kamieniec     | 201a |
| Bardo Śląskie | Złoty Stok    | 10 | Kamieniec     | 201b |
| Bardo Śląskie | Złoty Stok    | 10 | Kamieniec     | 212m |
| Bardo Śląskie | Laski         | 12 | Kamieniec     | 167h |
| Bardo Śląskie | Laski         | 12 | Kamieniec     | 180a |
| Bardo Śląskie | Laski         | 12 | Kamieniec     | 313d |
| Bardo Śląskie | Laski         | 12 | Kamieniec     | 314a |
| Bardo Śląskie | Grodziszczce  | 01 | Bardo Śląskie | 11g  |
| Bardo Śląskie | Grodziszczce  | 01 | Bardo Śląskie | 12f  |
| Bardo Śląskie | Grodziszczce  | 01 | Bardo Śląskie | 20k  |
| Bardo Śląskie | Jemna         | 02 | Bardo Śląskie | 3j   |
| Bardo Śląskie | Jemna         | 02 | Bardo Śląskie | 5b   |
| Bardo Śląskie | Jemna         | 02 | Bardo Śląskie | 61f  |
| Bardo Śląskie | Jemna         | 02 | Bardo Śląskie | 7l   |
| Bardo Śląskie | Jemna         | 02 | Bardo Śląskie | 80k  |
| Bardo Śląskie | Jemna         | 02 | Bardo Śląskie | 82b  |
| Bardo Śląskie | Wilcza        | 03 | Bardo Śląskie | 158c |
| Bardo Śląskie | Wilcza        | 03 | Bardo Śląskie | 188d |
| Bardo Śląskie | Opolnica      | 05 | Bardo Śląskie | 256g |
| Bardo Śląskie | Mąkolno       | 08 | Kamieniec     | 101c |
| Bardo Śląskie | Złoty Stok    | 10 | Kamieniec     | 223d |
| Bardo Śląskie | Chwalisław    | 11 | Kamieniec     | 225h |

|               |                     |               |                              |                 |
|---------------|---------------------|---------------|------------------------------|-----------------|
| Bardo Śląskie | Chwalisław          | 11            | Kamieniec                    | 230b            |
| Bardo Śląskie | Chwalisław          | 11            | Kamieniec                    | 233b            |
| Bystrzyca     | Żelazno             | 01            | Bystrzyca Kłodzka            | 267K            |
| Bystrzyca     | Żelazno             | 01            | Bystrzyca Kłodzka            | 267O            |
| Bystrzyca     | Żelazno             | 01            | Bystrzyca Kłodzka            | 268J            |
| Bystrzyca     | Żelazno             | 01            | Bystrzyca Kłodzka            | 271f            |
| Bystrzyca     | Żelazno             | 01            | Bystrzyca Kłodzka            | 272A            |
| Bystrzyca     | Żelazno             | 01            | Bystrzyca Kłodzka            | 272b            |
| Bystrzyca     | Żelazno             | 01            | Bystrzyca Kłodzka            | 272D            |
| Bystrzyca     | Żelazno             | 01            | Bystrzyca Kłodzka            | 272F            |
| Bystrzyca     | Żelazno             | 01            | Bystrzyca Kłodzka            | <u>273K</u>     |
| Bystrzyca     | Żelazno             | 01            | Bystrzyca Kłodzka            | 274C            |
| Bystrzyca     | Żelazno             | 01            | Bystrzyca Kłodzka            | 274f            |
| Bystrzyca     | Żelazno             | 01            | Bystrzyca Kłodzka            | 274H            |
| Bystrzyca     | Żelazno             | 01            | Bystrzyca Kłodzka            | 274R            |
| Bystrzyca     | Żelazno             | 01            | Bystrzyca Kłodzka            | 276D            |
| Bystrzyca     | Żelazno             | 01            | Bystrzyca Kłodzka            | 278D            |
| Bystrzyca     | Żelazno             | 01            | Bystrzyca Kłodzka            | 279F            |
| Bystrzyca     | Żelazno             | 01            | Bystrzyca Kłodzka            | 280B            |
| Bystrzyca     | Żelazno             | 01            | Bystrzyca Kłodzka            | 280H            |
| Bystrzyca     | Żelazno             | 01            | Bystrzyca Kłodzka            | 291H            |
| Bystrzyca     | Żelazno             | 01            | Bystrzyca Kłodzka            | <u>312L</u>     |
| Bystrzyca     | Waliszów            | 02            | Bystrzyca Kłodzka            | 298A            |
| Bystrzyca     | Waliszów            | 02            | Bystrzyca Kłodzka            | 298k            |
| Bystrzyca     | Waliszów            | 02            | Bystrzyca Kłodzka            | 299a            |
| Bystrzyca     | Waliszów            | 02            | Bystrzyca Kłodzka            | 299F            |
| Bystrzyca     | <del>Waliszów</del> | <del>02</del> | <del>Bystrzyca Kłodzka</del> | <del>299F</del> |
| Bystrzyca     | Waliszów            | 02            | Bystrzyca Kłodzka            | 301j            |
| Bystrzyca     | Waliszów            | 02            | Bystrzyca Kłodzka            | 302F            |
| Bystrzyca     | Waliszów            | 02            | Bystrzyca Kłodzka            | <u>303S</u>     |
| Bystrzyca     | Waliszów            | 02            | Bystrzyca Kłodzka            | 304C            |
| Bystrzyca     | Waliszów            | 02            | Bystrzyca Kłodzka            | 305C            |
| Bystrzyca     | Waliszów            | 02            | Bystrzyca Kłodzka            | 305F            |
| Bystrzyca     | Waliszów            | 02            | Bystrzyca Kłodzka            | 308g            |
| Bystrzyca     | Waliszów            | 02            | Bystrzyca Kłodzka            | 309A            |
| Bystrzyca     | Waliszów            | 02            | Bystrzyca Kłodzka            | 313a            |
| Bystrzyca     | Waliszów            | 02            | Bystrzyca Kłodzka            | <u>315I</u>     |
| Bystrzyca     | Waliszów            | 02            | Bystrzyca Kłodzka            | 316b            |
| Bystrzyca     | Waliszów            | 02            | Bystrzyca Kłodzka            | 316D            |
| Bystrzyca     | Waliszów            | 02            | Bystrzyca Kłodzka            | 316H            |
| Bystrzyca     | Waliszów            | 02            | Bystrzyca Kłodzka            | 316I            |
| Bystrzyca     | Waliszów            | 02            | Bystrzyca Kłodzka            | 317C            |
| Bystrzyca     | Waliszów            | 02            | Bystrzyca Kłodzka            | 317j            |
| Bystrzyca     | Waliszów            | 02            | Bystrzyca Kłodzka            | 318C            |
| Bystrzyca     | Waliszów            | 02            | Bystrzyca Kłodzka            | <u>320M</u>     |
| Bystrzyca     | Waliszów            | 02            | Bystrzyca Kłodzka            | 321G            |
| Bystrzyca     | Waliszów            | 02            | Bystrzyca Kłodzka            | 321H            |
| Bystrzyca     | Waliszów            | 02            | Bystrzyca Kłodzka            | 323a            |
| Bystrzyca     | Waliszów            | 02            | Bystrzyca Kłodzka            | 323H            |
| Bystrzyca     | Waliszów            | 02            | Bystrzyca Kłodzka            | 325h            |
| Bystrzyca     | Waliszów            | 02            | Bystrzyca Kłodzka            | 325L            |

|           |          |    |                   |             |
|-----------|----------|----|-------------------|-------------|
| Bystrzyca | Waliszów | 02 | Bystrzyca Kłodzka | 327A        |
| Bystrzyca | Waliszów | 02 | Bystrzyca Kłodzka | 327g        |
| Bystrzyca | Waliszów | 02 | Bystrzyca Kłodzka | 330A        |
| Bystrzyca | Waliszów | 02 | Bystrzyca Kłodzka | <u>330L</u> |
| Bystrzyca | Waliszów | 02 | Bystrzyca Kłodzka | 331A        |
| Bystrzyca | Waliszów | 02 | Bystrzyca Kłodzka | 6J          |
| Bystrzyca | Paszków  | 02 | Bystrzyca Kłodzka | <u>187F</u> |
| Bystrzyca | Paszków  | 02 | Bystrzyca Kłodzka | <u>213D</u> |
| Bystrzyca | Paszków  | 02 | Bystrzyca Kłodzka | <u>214J</u> |
| Bystrzyca | Szklarka | 03 | Bystrzyca Kłodzka | 11T         |
| Bystrzyca | Szklarka | 03 | Bystrzyca Kłodzka | 11W         |
| Bystrzyca | Szklarka | 03 | Bystrzyca Kłodzka | <u>13j</u>  |
| Bystrzyca | Szklarka | 03 | Bystrzyca Kłodzka | 14a         |
| Bystrzyca | Szklarka | 03 | Bystrzyca Kłodzka | 15a         |
| Bystrzyca | Szklarka | 03 | Bystrzyca Kłodzka | 16C         |
| Bystrzyca | Szklarka | 03 | Bystrzyca Kłodzka | 16D         |
| Bystrzyca | Szklarka | 03 | Bystrzyca Kłodzka | 16G         |
| Bystrzyca | Szklarka | 03 | Bystrzyca Kłodzka | 16G         |
| Bystrzyca | Szklarka | 03 | Bystrzyca Kłodzka | 16H         |
| Bystrzyca | Szklarka | 03 | Bystrzyca Kłodzka | 16I         |
| Bystrzyca | Szklarka | 03 | Bystrzyca Kłodzka | 17K         |
| Bystrzyca | Szklarka | 03 | Bystrzyca Kłodzka | 17P         |
| Bystrzyca | Szklarka | 03 | Bystrzyca Kłodzka | 18F         |
| Bystrzyca | Szklarka | 03 | Bystrzyca Kłodzka | 18G         |
| Bystrzyca | Szklarka | 03 | Bystrzyca Kłodzka | 19A         |
| Bystrzyca | Szklarka | 03 | Bystrzyca Kłodzka | 19H         |
| Bystrzyca | Szklarka | 03 | Bystrzyca Kłodzka | 19I         |
| Bystrzyca | Szklarka | 03 | Bystrzyca Kłodzka | 19J         |
| Bystrzyca | Szklarka | 03 | Bystrzyca Kłodzka | 19K         |
| Bystrzyca | Szklarka | 03 | Bystrzyca Kłodzka | 19M         |
| Bystrzyca | Szklarka | 03 | Bystrzyca Kłodzka | 20C         |
| Bystrzyca | Szklarka | 03 | Bystrzyca Kłodzka | 20D         |
| Bystrzyca | Szklarka | 03 | Bystrzyca Kłodzka | 20K         |
| Bystrzyca | Szklarka | 03 | Bystrzyca Kłodzka | 20L         |
| Bystrzyca | Szklarka | 03 | Bystrzyca Kłodzka | 21B         |
| Bystrzyca | Szklarka | 03 | Bystrzyca Kłodzka | 21G         |
| Bystrzyca | Szklarka | 03 | Bystrzyca Kłodzka | 21H         |
| Bystrzyca | Szklarka | 03 | Bystrzyca Kłodzka | 21J         |
| Bystrzyca | Szklarka | 03 | Bystrzyca Kłodzka | 22B         |
| Bystrzyca | Szklarka | 03 | Bystrzyca Kłodzka | 22C         |
| Bystrzyca | Szklarka | 03 | Bystrzyca Kłodzka | 22D         |
| Bystrzyca | Szklarka | 03 | Bystrzyca Kłodzka | <u>23G</u>  |
| Bystrzyca | Szklarka | 03 | Bystrzyca Kłodzka | 24A         |
| Bystrzyca | Szklarka | 03 | Bystrzyca Kłodzka | 24F         |
| Bystrzyca | Szklarka | 03 | Bystrzyca Kłodzka | 24g         |
| Bystrzyca | Szklarka | 03 | Bystrzyca Kłodzka | 25G         |
| Bystrzyca | Szklarka | 03 | Bystrzyca Kłodzka | 27A         |
| Bystrzyca | Szklarka | 03 | Bystrzyca Kłodzka | 27C         |
| Bystrzyca | Szklarka | 03 | Bystrzyca Kłodzka | 27K         |
| Bystrzyca | Szklarka | 03 | Bystrzyca Kłodzka | 28A         |
| Bystrzyca | Szklarka | 03 | Bystrzyca Kłodzka | 29D         |

|           |          |    |                   |             |
|-----------|----------|----|-------------------|-------------|
| Bystrzyca | Szklarka | 03 | Bystrzyca Kłodzka | 2c          |
| Bystrzyca | Szklarka | 03 | Bystrzyca Kłodzka | 30B         |
| Bystrzyca | Szklarka | 03 | Bystrzyca Kłodzka | 34B         |
| Bystrzyca | Szklarka | 03 | Bystrzyca Kłodzka | 34C         |
| Bystrzyca | Szklarka | 03 | Bystrzyca Kłodzka | 3f          |
| Bystrzyca | Szklarka | 03 | Bystrzyca Kłodzka | 4d          |
| Bystrzyca | Szklarka | 03 | Bystrzyca Kłodzka | 7C          |
| Bystrzyca | Szklarka | 03 | Bystrzyca Kłodzka | 7I          |
| Bystrzyca | Szklarka | 03 | Bystrzyca Kłodzka | 8B          |
| Bystrzyca | Szklarka | 03 | Bystrzyca Kłodzka | 8D          |
| Bystrzyca | Szklarka | 03 | Bystrzyca Kłodzka | 9F          |
| Bystrzyca | Wyszki   | 04 | Bystrzyca Kłodzka | <u>156h</u> |
| Bystrzyca | Wyszki   | 04 | Bystrzyca Kłodzka | <u>157f</u> |
| Bystrzyca | Wyszki   | 04 | Bystrzyca Kłodzka | 158a        |
| Bystrzyca | Wyszki   | 04 | Bystrzyca Kłodzka | 159a        |
| Bystrzyca | Wyszki   | 04 | Bystrzyca Kłodzka | 159f        |
| Bystrzyca | Wyszki   | 04 | Bystrzyca Kłodzka | 159i        |
| Bystrzyca | Wyszki   | 04 | Bystrzyca Kłodzka | 159I        |
| Bystrzyca | Wyszki   | 04 | Bystrzyca Kłodzka | 160b        |
| Bystrzyca | Wyszki   | 04 | Bystrzyca Kłodzka | <u>301K</u> |
| Bystrzyca | Wyszki   | 04 | Bystrzyca Kłodzka | <u>37h</u>  |
| Bystrzyca | Wyszki   | 04 | Bystrzyca Kłodzka | 38D         |
| Bystrzyca | Wyszki   | 04 | Bystrzyca Kłodzka | 38F         |
| Bystrzyca | Wyszki   | 04 | Bystrzyca Kłodzka | 38G         |
| Bystrzyca | Wyszki   | 04 | Bystrzyca Kłodzka | 38L         |
| Bystrzyca | Wyszki   | 04 | Bystrzyca Kłodzka | 38M         |
| Bystrzyca | Wyszki   | 04 | Bystrzyca Kłodzka | 54B         |
| Bystrzyca | Wyszki   | 04 | Bystrzyca Kłodzka | 54g         |
| Bystrzyca | Wyszki   | 04 | Bystrzyca Kłodzka | 54j         |
| Bystrzyca | Wyszki   | 04 | Bystrzyca Kłodzka | 54M         |
| Bystrzyca | Wyszki   | 04 | Bystrzyca Kłodzka | 56D         |
| Bystrzyca | Wyszki   | 04 | Bystrzyca Kłodzka | 56f         |
| Bystrzyca | Wyszki   | 04 | Bystrzyca Kłodzka | 56H         |
| Bystrzyca | Wyszki   | 04 | Bystrzyca Kłodzka | 56m         |
| Bystrzyca | Wyszki   | 04 | Bystrzyca Kłodzka | 56N         |
| Bystrzyca | Wyszki   | 04 | Bystrzyca Kłodzka | 56R         |
| Bystrzyca | Wyszki   | 04 | Bystrzyca Kłodzka | 60D         |
| Bystrzyca | Wyszki   | 04 | Bystrzyca Kłodzka | 60F         |
| Bystrzyca | Wyszki   | 04 | Bystrzyca Kłodzka | 60M         |
| Bystrzyca | Wyszki   | 04 | Bystrzyca Kłodzka | 61f         |
| Bystrzyca | Wyszki   | 04 | Bystrzyca Kłodzka | 61k         |
| Bystrzyca | Wyszki   | 04 | Bystrzyca Kłodzka | 66D         |
| Bystrzyca | Wyszki   | 04 | Bystrzyca Kłodzka | 66F         |
| Bystrzyca | Wyszki   | 04 | Bystrzyca Kłodzka | 66K         |
| Bystrzyca | Wyszki   | 04 | Bystrzyca Kłodzka | 67A         |
| Bystrzyca | Wyszki   | 04 | Bystrzyca Kłodzka | 67C         |
| Bystrzyca | Wyszki   | 04 | Bystrzyca Kłodzka | 67d         |
| Bystrzyca | Wyszki   | 04 | Bystrzyca Kłodzka | 67I         |
| Bystrzyca | Wyszki   | 04 | Bystrzyca Kłodzka | 67j         |
| Bystrzyca | Wyszki   | 04 | Bystrzyca Kłodzka | 67K         |
| Bystrzyca | Wyszki   | 04 | Bystrzyca Kłodzka | 69a         |



|           |                |    |                   |             |
|-----------|----------------|----|-------------------|-------------|
| Bystrzyca | Wyszki         | 04 | Bystrzyca Kłodzka | 69G         |
| Bystrzyca | Wyszki         | 04 | Bystrzyca Kłodzka | 70b         |
| Bystrzyca | Wyszki         | 04 | Bystrzyca Kłodzka | 70c         |
| Bystrzyca | Wyszki         | 04 | Bystrzyca Kłodzka | 70h         |
| Bystrzyca | Wyszki         | 04 | Bystrzyca Kłodzka | 71c         |
| Bystrzyca | Wyszki         | 04 | Bystrzyca Kłodzka | 71f         |
| Bystrzyca | Wyszki         | 04 | Bystrzyca Kłodzka | 72A         |
| Bystrzyca | Wyszki         | 04 | Bystrzyca Kłodzka | 72M         |
| Bystrzyca | Wyszki         | 04 | Bystrzyca Kłodzka | 72o         |
| Bystrzyca | Wyszki         | 04 | Bystrzyca Kłodzka | 73D         |
| Bystrzyca | Wyszki         | 04 | Bystrzyca Kłodzka | 73I         |
| Bystrzyca | Wyszki         | 04 | Bystrzyca Kłodzka | 73N         |
| Bystrzyca | Wyszki         | 04 | Bystrzyca Kłodzka | 74C         |
| Bystrzyca | Wyszki         | 04 | Bystrzyca Kłodzka | 74D         |
| Bystrzyca | Wyszki         | 04 | Bystrzyca Kłodzka | 74F         |
| Bystrzyca | Wyszki         | 04 | Bystrzyca Kłodzka | 74G         |
| Bystrzyca | Wyszki         | 04 | Bystrzyca Kłodzka | 77g         |
| Bystrzyca | Wyszki         | 04 | Bystrzyca Kłodzka | 80d         |
| Bystrzyca | Wyszki         | 04 | Bystrzyca Kłodzka | 80g         |
| Bystrzyca | Wyszki         | 04 | Bystrzyca Kłodzka | 81b         |
| Bystrzyca | Wyszki         | 04 | Bystrzyca Kłodzka | 81C         |
| Bystrzyca | Długopole      | 05 | Bystrzyca Kłodzka | 257g        |
| Bystrzyca | Długopole Dln. | 05 | Bystrzyca Kłodzka | 256B        |
| Bystrzyca | Długopole Dln. | 05 | Bystrzyca Kłodzka | 256S        |
| Bystrzyca | Długopole Dln. | 05 | Bystrzyca Kłodzka | 260A        |
| Bystrzyca | Długopole Dln. | 05 | Bystrzyca Kłodzka | 260B        |
| Bystrzyca | Długopole Dln. | 05 | Bystrzyca Kłodzka | <u>261H</u> |
| Bystrzyca | Długopole Dln. | 05 | Bystrzyca Kłodzka | 262A        |
| Bystrzyca | Długopole Dln. | 05 | Bystrzyca Kłodzka | 262J        |
| Bystrzyca | Długopole Dln. | 05 | Bystrzyca Kłodzka | 262M        |
| Bystrzyca | Długopole Dln. | 05 | Bystrzyca Kłodzka | 262O        |
| Bystrzyca | Długopole Dln. | 05 | Bystrzyca Kłodzka | 262T        |
| Bystrzyca | Długopole Dln. | 05 | Bystrzyca Kłodzka | 263A        |
| Bystrzyca | Długopole Dln. | 05 | Bystrzyca Kłodzka | 263B        |
| Bystrzyca | Długopole Dln. | 05 | Bystrzyca Kłodzka | 263G        |
| Bystrzyca | Długopole Dln. | 05 | Bystrzyca Kłodzka | 263J        |
| Bystrzyca | Długopole Dln. | 05 | Bystrzyca Kłodzka | 263O        |
| Bystrzyca | Długopole Dln. | 05 | Bystrzyca Kłodzka | 263T        |
| Bystrzyca | Długopole Dln. | 05 | Bystrzyca Kłodzka | 263Z        |
| Bystrzyca | Długopole Dln. | 05 | Bystrzyca Kłodzka | 264B        |
| Bystrzyca | Długopole Dln. | 05 | Bystrzyca Kłodzka | 265G        |
| Bystrzyca | Długopole Dln. | 05 | Bystrzyca Kłodzka | 265K        |
| Bystrzyca | Długopole Dln. | 05 | Bystrzyca Kłodzka | 36 l        |
| Bystrzyca | Długopole Dln. | 05 | Bystrzyca Kłodzka | 36 p        |
| Bystrzyca | Długopole Dln. | 05 | Bystrzyca Kłodzka | 36 s        |
| Bystrzyca | Długopole Dln. | 05 | Bystrzyca Kłodzka | 39 A        |
| Bystrzyca | Długopole Dln. | 05 | Bystrzyca Kłodzka | 40 B        |
| Bystrzyca | Długopole Dln. | 05 | Bystrzyca Kłodzka | 40 C        |
| Bystrzyca | Długopole Dln. | 05 | Bystrzyca Kłodzka | 42a         |
| Bystrzyca | Długopole Dln. | 05 | Bystrzyca Kłodzka | 43 A        |
| Bystrzyca | Długopole Dln. | 05 | Bystrzyca Kłodzka | 43 F        |

|           |                |    |                   |             |
|-----------|----------------|----|-------------------|-------------|
| Bystrzyca | Długopole Dln. | 05 | Bystrzyca Kłodzka | 44 A        |
| Bystrzyca | Długopole Dln. | 05 | Bystrzyca Kłodzka | <u>45 I</u> |
| Bystrzyca | Długopole Dln. | 05 | Bystrzyca Kłodzka | <u>45 N</u> |
| Bystrzyca | Długopole Dln. | 05 | Bystrzyca Kłodzka | 48 B        |
| Bystrzyca | Długopole Dln. | 05 | Bystrzyca Kłodzka | 49 J        |
| Bystrzyca | Długopole Dln. | 05 | Bystrzyca Kłodzka | 50 C        |
| Bystrzyca | Długopole Dln. | 05 | Bystrzyca Kłodzka | 51 A        |
| Bystrzyca | Długopole Dln. | 05 | Bystrzyca Kłodzka | 53 C        |
| Bystrzyca | Długopole Dln. | 05 | Bystrzyca Kłodzka | 57 B        |
| Bystrzyca | Długopole Dln. | 05 | Bystrzyca Kłodzka | 57 D        |
| Bystrzyca | Długopole Dln. | 05 | Bystrzyca Kłodzka | 58 C        |
| Bystrzyca | Długopole Dln. | 05 | Bystrzyca Kłodzka | 58 D        |
| Bystrzyca | Spalona Dolna  | 06 | Bystrzyca Kłodzka | 100a        |
| Bystrzyca | Spalona Dolna  | 06 | Bystrzyca Kłodzka | 101b        |
| Bystrzyca | Spalona Dolna  | 06 | Bystrzyca Kłodzka | 101c        |
| Bystrzyca | Spalona Dolna  | 06 | Bystrzyca Kłodzka | 101m        |
| Bystrzyca | Spalona Dolna  | 06 | Bystrzyca Kłodzka | 102c        |
| Bystrzyca | Spalona Dolna  | 06 | Bystrzyca Kłodzka | 102g        |
| Bystrzyca | Spalona Dolna  | 06 | Bystrzyca Kłodzka | 105a        |
| Bystrzyca | Spalona Dolna  | 06 | Bystrzyca Kłodzka | 106a        |
| Bystrzyca | Spalona Dolna  | 06 | Bystrzyca Kłodzka | 111b        |
| Bystrzyca | Spalona Dolna  | 06 | Bystrzyca Kłodzka | 150A        |
| Bystrzyca | Spalona Dolna  | 06 | Bystrzyca Kłodzka | 150B        |
| Bystrzyca | Spalona Dolna  | 06 | Bystrzyca Kłodzka | 152a        |
| Bystrzyca | Spalona Dolna  | 06 | Bystrzyca Kłodzka | 152B        |
| Bystrzyca | Spalona Dolna  | 06 | Bystrzyca Kłodzka | 152d        |
| Bystrzyca | Spalona Dolna  | 06 | Bystrzyca Kłodzka | 153D        |
| Bystrzyca | Spalona Dolna  | 06 | Bystrzyca Kłodzka | 234A        |
| Bystrzyca | Spalona Dolna  | 06 | Bystrzyca Kłodzka | 234C        |
| Bystrzyca | Spalona Dolna  | 06 | Bystrzyca Kłodzka | 87b         |
| Bystrzyca | Spalona Dolna  | 06 | Bystrzyca Kłodzka | 87F         |
| Bystrzyca | Spalona Dolna  | 06 | Bystrzyca Kłodzka | 87I         |
| Bystrzyca | Spalona Dolna  | 06 | Bystrzyca Kłodzka | 87N         |
| Bystrzyca | Spalona Dolna  | 06 | Bystrzyca Kłodzka | 88I         |
| Bystrzyca | Spalona Dolna  | 06 | Bystrzyca Kłodzka | 89A         |
| Bystrzyca | Spalona Dolna  | 06 | Bystrzyca Kłodzka | 89g         |
| Bystrzyca | Spalona Dolna  | 06 | Bystrzyca Kłodzka | 90b         |
| Bystrzyca | Spalona Dolna  | 06 | Bystrzyca Kłodzka | 90C         |
| Bystrzyca | Spalona Dolna  | 06 | Bystrzyca Kłodzka | 90d         |
| Bystrzyca | Spalona Dolna  | 06 | Bystrzyca Kłodzka | 90g         |
| Bystrzyca | Spalona Dolna  | 06 | Bystrzyca Kłodzka | 90I         |
| Bystrzyca | Spalona Dolna  | 06 | Bystrzyca Kłodzka | 91A         |
| Bystrzyca | Spalona Dolna  | 06 | Bystrzyca Kłodzka | 91f         |
| Bystrzyca | Spalona Dolna  | 06 | Bystrzyca Kłodzka | 92d         |
| Bystrzyca | Spalona Dolna  | 06 | Bystrzyca Kłodzka | 92g         |
| Bystrzyca | Spalona Dolna  | 06 | Bystrzyca Kłodzka | 93a         |
| Bystrzyca | Spalona Dolna  | 06 | Bystrzyca Kłodzka | 93c         |
| Bystrzyca | Spalona Dolna  | 06 | Bystrzyca Kłodzka | 93h         |
| Bystrzyca | Spalona Dolna  | 06 | Bystrzyca Kłodzka | <u>95G</u>  |
| Bystrzyca | Spalona Dolna  | 06 | Bystrzyca Kłodzka | 96a         |
| Bystrzyca | Spalona Dolna  | 06 | Bystrzyca Kłodzka | 97B         |

|           |               |    |                   |             |
|-----------|---------------|----|-------------------|-------------|
| Bystrzyca | Spalona Dolna | 06 | Bystrzyca Kłodzka | 97I         |
| Bystrzyca | Spalona Dolna | 06 | Bystrzyca Kłodzka | 97K         |
| Bystrzyca | Spalona Dolna | 06 | Bystrzyca Kłodzka | 97O         |
| Bystrzyca | Spalona Dolna | 06 | Bystrzyca Kłodzka | 98a         |
| Bystrzyca | Spalona Dolna | 06 | Bystrzyca Kłodzka | 98d         |
| Bystrzyca | Spalona Dolna | 06 | Bystrzyca Kłodzka | 99a         |
| Bystrzyca | Piaskowice    | 07 | Bystrzyca Kłodzka | <u>128G</u> |
| Bystrzyca | Piaskowice    | 07 | Bystrzyca Kłodzka | <u>128h</u> |
| Bystrzyca | Piaskowice    | 07 | Bystrzyca Kłodzka | <u>128i</u> |
| Bystrzyca | Piaskowice    | 07 | Bystrzyca Kłodzka | <u>128I</u> |
| Bystrzyca | Piaskowice    | 07 | Bystrzyca Kłodzka | <u>128M</u> |
| Bystrzyca | Piaskowice    | 07 | Bystrzyca Kłodzka | <u>136F</u> |
| Bystrzyca | Piaskowice    | 07 | Bystrzyca Kłodzka | 139B        |
| Bystrzyca | Piaskowice    | 07 | Bystrzyca Kłodzka | <u>140D</u> |
| Bystrzyca | Piaskowice    | 07 | Bystrzyca Kłodzka | 142B        |
| Bystrzyca | Piaskowice    | 07 | Bystrzyca Kłodzka | <u>145H</u> |
| Bystrzyca | Piaskowice    | 07 | Bystrzyca Kłodzka | 148B        |
| Bystrzyca | Piaskowice    | 07 | Bystrzyca Kłodzka | 239A        |
| Bystrzyca | Piaskowice    | 07 | Bystrzyca Kłodzka | <u>245M</u> |
| Bystrzyca | Piaskowice    | 07 | Bystrzyca Kłodzka | 247B        |
| Bystrzyca | Piaskowice    | 07 | Bystrzyca Kłodzka | 248B        |
| Bystrzyca | Piaskowice    | 07 | Bystrzyca Kłodzka | 249C        |
| Bystrzyca | Spalona Górna | 08 | Bystrzyca Kłodzka | 219A        |
| Bystrzyca | Spalona Górna | 08 | Bystrzyca Kłodzka | 179D        |
| Bystrzyca | Spalona Górna | 08 | Bystrzyca Kłodzka | 198D        |
| Bystrzyca | Spalona Górna | 08 | Bystrzyca Kłodzka | 199G        |
| Bystrzyca | Spalona Górna | 08 | Bystrzyca Kłodzka | <u>203F</u> |
| Bystrzyca | Spalona Górna | 08 | Bystrzyca Kłodzka | 204a        |
| Bystrzyca | Spalona Górna | 08 | Bystrzyca Kłodzka | 205a        |
| Bystrzyca | Spalona Górna | 08 | Bystrzyca Kłodzka | 207C        |
| Bystrzyca | Spalona Górna | 08 | Bystrzyca Kłodzka | <u>213I</u> |
| Bystrzyca | Spalona Górna | 08 | Bystrzyca Kłodzka | 214C        |
| Bystrzyca | Spalona Górna | 08 | Bystrzyca Kłodzka | 214K        |
| Bystrzyca | Spalona Górna | 08 | Bystrzyca Kłodzka | 216A        |
| Bystrzyca | Spalona Górna | 08 | Bystrzyca Kłodzka | 216G        |
| Bystrzyca | Spalona Górna | 08 | Bystrzyca Kłodzka | 219B        |
| Bystrzyca | Spalona Górna | 08 | Bystrzyca Kłodzka | <u>226J</u> |
| Bystrzyca | Spalona Górna | 08 | Bystrzyca Kłodzka | 227A        |
| Bystrzyca | Spalona Górna | 08 | Bystrzyca Kłodzka | 227N        |
| Bystrzyca | Spalona Górna | 08 | Bystrzyca Kłodzka | 228D        |
| Bystrzyca | Spalona Górna | 08 | Bystrzyca Kłodzka | 229A        |
| Bystrzyca | Spalona Górna | 08 | Bystrzyca Kłodzka | 232a        |
| Bystrzyca | Spalona Grn.  | 08 | Bystrzyca Kłodzka | 201g        |
| Bystrzyca | Spalona Grn.  | 08 | Bystrzyca Kłodzka | <u>204e</u> |
| Bystrzyca | Spalona Grn.  | 08 | Bystrzyca Kłodzka | 205b        |
| Bystrzyca | Poręba        | 09 | Bystrzyca Kłodzka | 161C        |
| Bystrzyca | Poręba        | 09 | Bystrzyca Kłodzka | <u>163L</u> |
| Bystrzyca | Poręba        | 09 | Bystrzyca Kłodzka | <u>165F</u> |
| Bystrzyca | Poręba        | 09 | Bystrzyca Kłodzka | 181B        |
| Bystrzyca | Poręba        | 09 | Bystrzyca Kłodzka | 183B        |
| Bystrzyca | Poręba        | 09 | Bystrzyca Kłodzka | 183D        |

|           |             |    |                   |             |
|-----------|-------------|----|-------------------|-------------|
| Bystrzyca | Poręba      | 09 | Bystrzyca Kłodzka | 183F        |
| Bystrzyca | Poręba      | 09 | Bystrzyca Kłodzka | 184F        |
| Bystrzyca | Poręba      | 09 | Bystrzyca Kłodzka | 187A        |
| Bystrzyca | Poręba      | 09 | Bystrzyca Kłodzka | 187i        |
| Bystrzyca | Poręba      | 09 | Bystrzyca Kłodzka | 189D        |
| Bystrzyca | Poręba      | 09 | Bystrzyca Kłodzka | 190c        |
| Bystrzyca | Poręba      | 09 | Bystrzyca Kłodzka | 191F        |
| Bystrzyca | Poręba      | 09 | Bystrzyca Kłodzka | 192A        |
| Bystrzyca | Poręba      | 09 | Bystrzyca Kłodzka | 192C        |
| Bystrzyca | Poręba      | 09 | Bystrzyca Kłodzka | 83L         |
| Bystrzyca | Poręba      | 09 | Bystrzyca Kłodzka | <u>84J</u>  |
| Bystrzyca | Poręba      | 09 | Bystrzyca Kłodzka | 85B         |
| Bystrzyca | Łomnica     | 10 | Pokrzywno         | 218B        |
| Bystrzyca | Łomnica     | 10 | Pokrzywno         | 219a        |
| Bystrzyca | Łomnica     | 10 | Pokrzywno         | 219c        |
| Bystrzyca | Łomnica     | 10 | Pokrzywno         | 219I        |
| Bystrzyca | Łomnica     | 10 | Pokrzywno         | 235B        |
| Bystrzyca | Łomnica     | 10 | Pokrzywno         | 261B        |
| Bystrzyca | Łomnica     | 10 | Pokrzywno         | 263C        |
| Bystrzyca | Łomnica     | 10 | Pokrzywno         | 281D        |
| Bystrzyca | Łomnica     | 10 | Pokrzywno         | 295B        |
| Bystrzyca | Łomnica     | 10 | Pokrzywno         | 295C        |
| Bystrzyca | Łomnica     | 10 | Pokrzywno         | 297b        |
| Bystrzyca | Łomnica     | 10 | Pokrzywno         | 297F        |
| Bystrzyca | Łomnica     | 10 | Pokrzywno         | 313A        |
| Bystrzyca | Łomnica     | 10 | Pokrzywno         | 313J        |
| Bystrzyca | Łomnica     | 10 | Pokrzywno         | 314A        |
| Bystrzyca | Kamienna G. | 11 | Pokrzywno         | <u>107D</u> |
| Bystrzyca | Kamienna G. | 11 | Pokrzywno         | <u>348i</u> |
| Bystrzyca | Kamienna G. | 11 | Pokrzywno         | <u>348K</u> |
| Bystrzyca | Kamienna G. | 11 | Pokrzywno         | <u>348L</u> |
| Bystrzyca | Kamienna G. | 11 | Pokrzywno         | <u>348M</u> |
| Bystrzyca | Kamienna G. | 11 | Pokrzywno         | <u>349G</u> |
| Bystrzyca | Kamienna G. | 11 | Pokrzywno         | <u>349H</u> |
| Bystrzyca | Kamienna G. | 11 | Pokrzywno         | <u>350B</u> |
| Bystrzyca | Kamienna G. | 11 | Pokrzywno         | <u>351C</u> |
| Bystrzyca | Kamienna G. | 11 | Pokrzywno         | <u>351H</u> |
| Bystrzyca | Kamienna G. | 11 | Pokrzywno         | <u>352B</u> |
| Bystrzyca | Kamienna G. | 11 | Pokrzywno         | <u>352C</u> |
| Bystrzyca | Kamienna G. | 11 | Pokrzywno         | <u>352G</u> |
| Bystrzyca | Kamienna G. | 11 | Pokrzywno         | <u>353A</u> |
| Bystrzyca | Kamienna G. | 11 | Pokrzywno         | <u>354D</u> |
| Bystrzyca | Kamienna G. | 11 | Pokrzywno         | <u>354H</u> |
| Bystrzyca | Kamienna G. | 11 | Pokrzywno         | 52A         |
| Bystrzyca | Kamienna G. | 11 | Pokrzywno         | 52b         |
| Bystrzyca | Kamienna G. | 11 | Pokrzywno         | <u>53G</u>  |
| Bystrzyca | Kamienna G. | 11 | Pokrzywno         | 54a         |
| Bystrzyca | Kamienna G. | 11 | Pokrzywno         | 57AX        |
| Bystrzyca | Kamienna G. | 11 | Pokrzywno         | 57BX        |
| Bystrzyca | Kamienna G. | 11 | Pokrzywno         | 57CX        |
| Bystrzyca | Kamienna G. | 11 | Pokrzywno         | 57R         |

|             |             |    |                   |             |
|-------------|-------------|----|-------------------|-------------|
| Bystrzyca   | Kamienna G. | 11 | Pokrzywno         | 57Z         |
| Bystrzyca   | Kamienna G. | 11 | Pokrzywno         | <u>68K</u>  |
| Bystrzyca   | Kamienna G. | 11 | Pokrzywno         | 69A         |
| Bystrzyca   | Kamienna G. | 11 | Pokrzywno         | 69G         |
| Bystrzyca   | Kamienna G. | 11 | Bystrzyca Kłodzka | 70a         |
| Bystrzyca   | Kamienna G. | 11 | Pokrzywno         | 70B         |
| Bystrzyca   | Kamienna G. | 11 | Pokrzywno         | <u>71g</u>  |
| Bystrzyca   | Paszków     | 12 | Pokrzywno         | 125a        |
| Bystrzyca   | Paszków     | 12 | Pokrzywno         | 168b        |
| Bystrzyca   | Paszków     | 12 | Pokrzywno         | <u>187F</u> |
| Bystrzyca   | Paszków     | 12 | Pokrzywno         | <u>213D</u> |
| Bystrzyca   | Młoty       | 14 | Pokrzywno         | 333F        |
| Bystrzyca   | Młoty       | 14 | Pokrzywno         | 341B        |
| Bystrzyca   | Młoty       | 14 | Pokrzywno         | 341D        |
| Bystrzyca   | Młoty       | 14 | Pokrzywno         | <u>342F</u> |
| Bystrzyca   | Młoty       | 14 | Pokrzywno         | <u>343F</u> |
| Bystrzyca   | Młoty       | 14 | Pokrzywno         | <u>344D</u> |
| Bystrzyca   | Młoty       | 14 | Pokrzywno         | 345F        |
| Bystrzyca   | Młoty       | 14 | Pokrzywno         | 346A        |
| Bystrzyca   | Lasówka     | 15 | Pokrzywno         | 120A        |
| Bystrzyca   | Lasówka     | 15 | Pokrzywno         | 253C        |
| Bystrzyca   | Lasówka     | 15 | Pokrzywno         | <u>254L</u> |
| Bystrzyca   | Lasówka     | 15 | Pokrzywno         | 292a        |
| Bystrzyca   | Lasówka     | 15 | Pokrzywno         | <u>351J</u> |
| Międzylesie | Gaworów     | 2  | Międygórze        | 101B        |
| Międzylesie | Gaworów     | 2  | Międzylesie       | 102C        |
| Międzylesie | Biała Woda  | 8  | Międzylesie       | 104I        |
| Międzylesie | Jodłów      | 3  | Międzylesie       | 106F        |
| Międzylesie | Jodłów      | 3  | Międzylesie       | 118G        |
| Międzylesie | Jodłów      | 3  | Międzylesie       | 119B        |
| Międzylesie | Jodłów      | 3  | Międzylesie       | 119Ba       |
| Międzylesie | Jodłów      | 3  | Międzylesie       | 119C        |
| Międzylesie | Jodłów      | 3  | Międzylesie       | 120Aa       |
| Międzylesie | Jodłów      | 3  | Międzylesie       | 120Ab       |
| Międzylesie | Gaworów     | 2  | Międzylesie       | 120Ai       |
| Międzylesie | Gaworów     | 2  | Międzylesie       | 120Aj       |
| Międzylesie | Gaworów     | 2  | Międzylesie       | 120B        |
| Międzylesie | Gaworów     | 2  | Międzylesie       | 122F        |
| Międzylesie | Smreczyna   | 5  | Międzylesie       | 123C        |
| Międzylesie | Smreczyna   | 5  | Międygórze        | 123F        |
| Międzylesie | Smreczyna   | 5  | Międygórze        | 123J        |
| Międzylesie | Smreczyna   | 5  | Międygórze        | 124A        |
| Międzylesie | Smreczyna   | 5  | Międzylesie       | 125I        |
| Międzylesie | Smreczyna   | 5  | Międzylesie       | 126F        |
| Międzylesie | Smreczyna   | 5  | Międzylesie       | 126M        |
| Międzylesie | Smreczyna   | 5  | Międzylesie       | 131J        |
| Międzylesie | Smreczyna   | 5  | Międzylesie       | 133I        |
| Międzylesie | Smreczyna   | 5  | Międygórze        | 140C        |
| Międzylesie | Smreczyna   | 5  | Międzylesie       | 140H        |
| Międzylesie | Smreczyna   | 5  | Międygórze        | 142I        |
| Międzylesie | Smreczyna   | 5  | Międygórze        | 144F        |

|             |           |    |             |      |
|-------------|-----------|----|-------------|------|
| Międzylesie | Smreczyna | 5  | Międygórze  | 145F |
| Międzylesie | Smreczyna | 5  | Międygórze  | 146A |
| Międzylesie | Smreczyna | 5  | Międygórze  | 146F |
| Międzylesie | Smreczyna | 5  | Międygórze  | 146G |
| Międzylesie | Smreczyna | 5  | Międygórze  | 147B |
| Międzylesie | Smreczyna | 5  | Międygórze  | 147F |
| Międzylesie | Smreczyna | 5  | Międygórze  | 147J |
| Międzylesie | Smreczyna | 5  | Międygórze  | 148D |
| Międzylesie | Smreczyna | 5  | Międzylesie | 148G |
| Międzylesie | Smreczyna | 5  | Międygórze  | 150C |
| Międzylesie | Różanka   | 4  | Międygórze  | 150N |
| Międzylesie | Różanka   | 4  | Międygórze  | 151B |
| Międzylesie | Różanka   | 4  | Międygórze  | 169F |
| Międzylesie | Różanka   | 4  | Międygórze  | 177C |
| Międzylesie | Różanka   | 4  | Międzylesie | 199C |
| Międzylesie | Różanka   | 4  | Międygórze  | 20D  |
| Międzylesie | Różanka   | 4  | Międygórze  | 21F  |
| Międzylesie | Różanka   | 4  | Międygórze  | 21G  |
| Międzylesie | Różanka   | 4  | Międzylesie | 240C |
| Międzylesie | Różanka   | 4  | Międygórze  | 25F  |
| Międzylesie | Różanka   | 4  | Międygórze  | 25K  |
| Międzylesie | Różanka   | 4  | Międygórze  | 28D  |
| Międzylesie | Różanka   | 4  | Międygórze  | 29G  |
| Międzylesie | Różanka   | 4  | Międygórze  | 32F  |
| Międzylesie | Różanka   | 4  | Międygórze  | 37B  |
| Międzylesie | Szklary   | 9  | Międygórze  | 44C  |
| Międzylesie | Szklary   | 9  | Międygórze  | 45B  |
| Międzylesie | Różanka   | 4  | Międzylesie | 46F  |
| Międzylesie | Szklary   | 9  | Międygórze  | 52F  |
| Międzylesie | Szklary   | 9  | Międygórze  | 54C  |
| Międzylesie | Szklary   | 9  | Międygórze  | 54H  |
| Międzylesie | Szklary   | 9  | Międygórze  | 54K  |
| Międzylesie | Szklary   | 9  | Międygórze  | 55B  |
| Międzylesie | Lesica    | 6  | Międygórze  | 55F  |
| Międzylesie | Lesica    | 6  | Międygórze  | 55H  |
| Międzylesie | Szklary   | 9  | Międygórze  | 55I  |
| Międzylesie | Szklary   | 9  | Międygórze  | 56C  |
| Międzylesie | Szklary   | 9  | Międygórze  | 56F  |
| Międzylesie | Lesica    | 6  | Międygórze  | 56K  |
| Międzylesie | Lesica    | 6  | Międygórze  | 57A  |
| Międzylesie | Szklary   | 9  | Międygórze  | 57G  |
| Międzylesie | Szklary   | 9  | Międygórze  | 59B  |
| Międzylesie | Lesica    | 6  | Międygórze  | 59G  |
| Międzylesie | Lesica    | 6  | Międygórze  | 59J  |
| Międzylesie | Szklary   | 9  | Międygórze  | 59L  |
| Międzylesie | Lesica    | 6  | Międygórze  | 60F  |
| Międzylesie | Lesica    | 6  | Międygórze  | 62I  |
| Międzylesie | Szklary   | 9  | Międygórze  | 64B  |
| Międzylesie | Szklary   | 9  | Międygórze  | 67A  |
| Międzylesie | Szklary   | 9  | Międygórze  | 71J  |
| Międzylesie | Śnieżnik  | 10 | Międygórze  | 77B  |

|               |           |    |               |      |
|---------------|-----------|----|---------------|------|
| Międzyzylesie | Śnieżnik  | 10 | Międzygórze   | 77G  |
| Międzyzylesie | Szklary   | 9  | Międzygórze   | 77H  |
| Międzyzylesie | Śnieżnik  | 10 | Międzygórze   | 77I  |
| Międzyzylesie | Śnieżnik  | 10 | Międzygórze   | 78G  |
| Międzyzylesie | Śnieżnik  | 10 | Międzygórze   | 80G  |
| Międzyzylesie | Śnieżnik  | 10 | Międzygórze   | 84F  |
| Międzyzylesie | Śnieżnik  | 10 | Międzygórze   | 84G  |
| Międzyzylesie | Szklary   | 9  | Międzygórze   | 84J  |
| Międzyzylesie | Szklary   | 9  | Międzygórze   | 85A  |
| Międzyzylesie | Szklary   | 9  | Międzygórze   | 85F  |
| Międzyzylesie | Szklary   | 9  | Międzygórze   | 88B  |
| Międzyzylesie | Szklary   | 9  | Międzyzylesie | 88L  |
| Międzyzylesie | Różanka   | 4  | Międzygórze   | 92A  |
| Międzyzylesie | Szklary   | 9  | Międzygórze   | 92D  |
| Międzyzylesie | Szklary   | 9  | Międzygórze   | 93B  |
| Międzyzylesie | Szklary   | 9  | Międzyzylesie | 93B  |
| Międzyzylesie | Szklary   | 9  | Międzyzylesie | 93G  |
| Międzyzylesie | Szklary   | 9  | Międzyzylesie | 93L  |
| Międzyzylesie | Szklary   | 9  | Międzyzylesie | 93P  |
| Międzyzylesie | Szklary   | 9  | Międzygórze   | 94B  |
| Międzyzylesie | Szklary   | 9  | Międzyzylesie | 96C  |
| Międzyzylesie | Szklary   | 9  | Międzygórze   | 96F  |
| Międzyzylesie | Lesica    | 6  | Międzyzylesie | 97D  |
| Międzyzylesie | Szklary   | 9  | Międzygórze   | 98C  |
| Międzyzylesie | Śnieżnik  | 10 | Międzyzylesie | 99I  |
| Międzyzylesie | Jawornica | 11 | Międzyzylesie | 100K |
| Międzyzylesie | Jawornica | 11 | Międzyzylesie | 100L |
| Międzyzylesie | Śnieżnik  | 10 | Międzyzylesie | 103J |
| Międzyzylesie | Śnieżnik  | 10 | Międzyzylesie | 105L |
| Międzyzylesie | Śnieżnik  | 10 | Międzyzylesie | 109J |
| Międzyzylesie | Śnieżnik  | 10 | Międzyzylesie | 111A |
| Międzyzylesie | Smreczyna | 5  | Międzyzylesie | 111B |
| Międzyzylesie | Idzików   | 7  | Międzyzylesie | 112G |
| Międzyzylesie | Idzików   | 7  | Międzyzylesie | 114J |
| Międzyzylesie | Idzików   | 7  | Międzyzylesie | 116A |
| Międzyzylesie | Idzików   | 7  | Międzyzylesie | 117B |
| Międzyzylesie | Jawornica | 11 | Międzyzylesie | 118B |
| Międzyzylesie | Idzików   | 7  | Międzyzylesie | 120J |
| Międzyzylesie | Jawornica | 11 | Międzygórze   | 122J |
| Międzyzylesie | Jawornica | 11 | Międzygórze   | 125B |
| Międzyzylesie | Jawornica | 11 | Międzygórze   | 125D |
| Międzyzylesie | Szklary   | 9  | Międzyzylesie | 125H |
| Międzyzylesie | Idzików   | 7  | Międzygórze   | 126F |
| Międzyzylesie | Idzików   | 7  | Międzygórze   | 129D |
| Międzyzylesie | Idzików   | 7  | Międzygórze   | 130C |
| Międzyzylesie | Idzików   | 7  | Międzygórze   | 144H |
| Międzyzylesie | Idzików   | 7  | Międzygórze   | 146J |
| Międzyzylesie | Idzików   | 7  | Międzygórze   | 147L |
| Międzyzylesie | Idzików   | 7  | Międzygórze   | 149A |
| Międzyzylesie | Idzików   | 7  | Międzygórze   | 149D |
| Międzyzylesie | Idzików   | 7  | Międzygórze   | 151A |

|               |            |   |               |      |
|---------------|------------|---|---------------|------|
| Międzyzylesie | Idzików    | 7 | Międzyzylesie | 151F |
| Międzyzylesie | Idzików    | 7 | Międzygórze   | 151G |
| Międzyzylesie | Idzików    | 7 | Międzygórze   | 176A |
| Międzyzylesie | Idzików    | 7 | Międzygórze   | 177A |
| Międzyzylesie | Idzików    | 7 | Międzygórze   | 22C  |
| Międzyzylesie | Idzików    | 7 | Międzygórze   | 253A |
| Międzyzylesie | Idzików    | 7 | Międzygórze   | 27I  |
| Międzyzylesie | Idzików    | 7 | Międzygórze   | 28C  |
| Międzyzylesie | Idzików    | 7 | Międzygórze   | 31B  |
| Międzyzylesie | Idzików    | 7 | Międzygórze   | 32A  |
| Międzyzylesie | Idzików    | 7 | Międzygórze   | 35C  |
| Międzyzylesie | Idzików    | 7 | Międzygórze   | 41D  |
| Międzyzylesie | Idzików    | 7 | Międzygórze   | 41O  |
| Międzyzylesie | Idzików    | 7 | Międzygórze   | 43F  |
| Międzyzylesie | Idzików    | 7 | Międzygórze   | 44F  |
| Międzyzylesie | Idzików    | 7 | Międzygórze   | 46C  |
| Międzyzylesie | Idzików    | 7 | Międzygórze   | 52D  |
| Międzyzylesie | Idzików    | 7 | Międzygórze   | 54A  |
| Międzyzylesie | Idzików    | 7 | Międzygórze   | 60G  |
| Międzyzylesie | Nowa Wieś  | 1 | Międzygórze   | 60K  |
| Międzyzylesie | Idzików    | 7 | Międzygórze   | 62B  |
| Międzyzylesie | Idzików    | 7 | Międzyzylesie | 93H  |
| Międzyzylesie | Idzików    | 7 | Międzyzylesie | 94B  |
| Międzyzylesie | Idzików    | 7 | Międzygórze   | 99F  |
| Międzyzylesie | Idzików    | 7 | Międzyzylesie | 102I |
| Międzyzylesie | Idzików    | 7 | Międzyzylesie | 104M |
| Międzyzylesie | Idzików    | 7 | Międzyzylesie | 109A |
| Międzyzylesie | Idzików    | 7 | Międzyzylesie | 110B |
| Międzyzylesie | Idzików    | 7 | Międzyzylesie | 111G |
| Międzyzylesie | Idzików    | 7 | Międzyzylesie | 117C |
| Międzyzylesie | Idzików    | 7 | Międzyzylesie | 118I |
| Międzyzylesie | Idzików    | 7 | Międzygórze   | 125K |
| Międzyzylesie | Idzików    | 7 | Międzygórze   | 27O  |
| Międzyzylesie | Idzików    | 7 | Międzygórze   | 31D  |
| Międzyzylesie | Idzików    | 7 | Międzygórze   | 41J  |
| Międzyzylesie | Idzików    | 7 | Międzygórze   | 41P  |
| Międzyzylesie | Idzików    | 7 | Międzygórze   | 42D  |
| Międzyzylesie | Idzików    | 7 | Międzygórze   | 46G  |
| Międzyzylesie | Idzików    | 7 | Międzygórze   | 48B  |
| Międzyzylesie | Idzików    | 7 | Międzygórze   | 53H  |
| Międzyzylesie | Idzików    | 7 | Międzyzylesie | 109K |
| Międzyzylesie | Idzików    | 7 | Międzyzylesie | 110C |
| Międzyzylesie | Idzików    | 7 | Międzyzylesie | 110D |
| Międzyzylesie | Idzików    | 7 | Międzyzylesie | 112A |
| Międzyzylesie | Idzików    | 7 | Międzyzylesie | 114H |
| Międzyzylesie | Idzików    | 7 | Międzyzylesie | 114I |
| Międzyzylesie | Biała Woda | 8 | Międzyzylesie | 115K |
| Międzyzylesie | Biała Woda | 8 | Międzyzylesie | 115R |
| Międzyzylesie | Biała Woda | 8 | Międzygórze   | 142G |
| Międzyzylesie | Biała Woda | 8 | Międzygórze   | 150b |
| Międzyzylesie | Biała Woda | 8 | Międzygórze   | 150B |



---

|               |            |   |               |      |
|---------------|------------|---|---------------|------|
| Międzyzylesie | Biała Woda | 8 | Międzygórze   | 177D |
| Międzyzylesie | Biała Woda | 8 | Międzygórze   | 30D  |
| Międzyzylesie | Biała Woda | 8 | Międzyzylesie | 103I |
| Międzyzylesie | Biała Woda | 8 | Międzyzylesie | 104F |
| Międzyzylesie | Biała Woda | 8 | Międzyzylesie | 109H |
| Międzyzylesie | Biała Woda | 8 | Międzyzylesie | 110A |
| Międzyzylesie | Biała Woda | 8 | Międzyzylesie | 112C |
| Międzyzylesie | Biała Woda | 8 | Międzyzylesie | 235D |
| Międzyzylesie | Biała Woda | 8 | Międzygórze   | 27K  |
| Międzyzylesie | Biała Woda | 8 | Międzygórze   | 53D  |
| Międzyzylesie | Biała Woda | 8 | Międzygórze   | 85C  |
| Międzyzylesie | Biała Woda | 8 | Międzyzylesie | 107D |
| Międzyzylesie | Biała Woda | 8 | Międzygórze   | 125J |
| Międzyzylesie | Biała Woda | 8 | Międzygórze   | 150I |
| Międzyzylesie | Gaworów    | 2 | Międzyzylesie | 110G |
| Międzyzylesie | Biała Woda | 8 | Międzyzylesie | 111C |
| Międzyzylesie | Biała Woda | 8 | Międzyzylesie | 115I |
| Międzyzylesie | Biała Woda | 8 | Międzygórze   | 30B  |
| Międzyzylesie | Gaworów    | 2 | Międzyzylesie | 105H |
| Międzyzylesie | Gaworów    | 2 | Międzygórze   | 122W |
| Międzyzylesie | Gaworów    | 2 | Międzyzylesie | 140J |
| Międzyzylesie | Gaworów    | 2 | Międzygórze   | 142J |
| Międzyzylesie | Gaworów    | 2 | Międzygórze   | 146B |
| Międzyzylesie | Biała Woda | 8 | Międzygórze   | 172i |
| Międzyzylesie | Gaworów    | 2 | Międzygórze   | 173b |
| Międzyzylesie | Gaworów    | 2 | Międzygórze   | 21M  |
| Międzyzylesie | Biała Woda | 8 | Międzygórze   | 225a |
| Międzyzylesie | Gaworów    | 2 | Międzygórze   | 234a |
| Międzyzylesie | Biała Woda | 8 | Międzygórze   | 32G  |
| Międzyzylesie | Biała Woda | 8 | Międzygórze   | 42d  |
| Międzyzylesie | Gaworów    | 2 | Międzygórze   | 75H  |

---
